# Supplementary material
Source: MDPI journal article supplement (https://www.mdpi.com/1999-4907/12/12/1634)
Supplement: s1 [file s1]

**Table S1.** Details of *Quercus ilex* trees selected for their tolerance to *P. cinnamomi* in two different areas of Spain.

| Provenance    | Code  | Localization of the tree | UTM coordinates (WGS84)  | <i>Phytophthora cinnamomi</i> in soil |
|---------------|-------|--------------------------|--------------------------|---------------------------------------|
| South-west    | PL-T1 | Plasencia (Cáceres)      | 39°58'01.6"N 6°05'33.9"W | +                                     |
|               | PL-T2 | Plasencia (Cáceres)      | 39°58'02.3"N 6°05'32.1"W | +                                     |
|               | PL-T3 | Plasencia (Cáceres)      | 39°58'02.7"N 6°05'31.2"W | +                                     |
|               | PL-T4 | Plasencia (Cáceres)      | 39°58'04.2"N 6°05'31.2"W | +                                     |
|               | PL-T5 | Plasencia (Cáceres)      | 39°58'04.2"N 6°05'31.2"W | +                                     |
|               | PL-T6 | Plasencia (Cáceres)      | 39°58'01.2"N 6°05'31.5"W | +                                     |
| Mediterranean | H1    | La Hunde (Valencia)      | 39°05'17.8"N 1°12'44.9"W | +                                     |
|               | H5    | La Hunde (Valencia)      | 39°05'25.1"N 1°12'50.5"W | +                                     |
|               | VA5   | La Vallivana (Castellón) | 40°31'27.0"N 0°02'22.9"W | +                                     |
|               | VA11  | La Vallivana (Castellón) | 40°33'50.1"N 0°01'05.3"W | nd                                    |

nd, not determined.

**Table S2.** Effects of the exposure time (24 h versus 48 h) to 25 mg L<sup>-1</sup> IBA and the genotype/ontogenic origin on the rooting of shoots of the VA5, VA11-Bs and VA11-C clones.

| Clone          | Rooting (%) | Root number | Root length (mm) |
|----------------|-------------|-------------|------------------|
| <b>VA5</b>     |             |             |                  |
| 24 h           | 52.0 ± 6.1  | 3.6 ± 0.6   | 24.3 ± 1.6       |
| 48 h           | 68.3 ± 5.9  | 4.9 ± 0.4   | 20.4 ± 2.4       |
| <b>VA11-Bs</b> |             |             |                  |
| 24 h           | 0.0 ± 0.0   | -           | -                |
| 48 h           | 0.0 ± 0.0   | -           | -                |
| <b>VA11-C</b>  |             |             |                  |

|                 |           |   |   |
|-----------------|-----------|---|---|
| 24 h            | 0.0 ± 0.0 | - | - |
| 48 h            | 0.0 ± 0.0 | - | - |
| <b>ANOVA II</b> |           |   |   |
| IBA TIME (A)    | 0.064ns   |   |   |
| GENOTYPE (B)    | 0.001***  |   |   |
| A x B           | 0.035*    |   |   |

Each value is the mean ± standard error of ten replicate jars with 5 explants per jar.

ANOVA II significances are shown for rooting parameter. ns not significant; \* significant differences at 95% ( $p \leq 0.05$ ); \*\*\* significant differences at 99.9% ( $p \leq 0.001$ ).

h: hours.
